# Supplementary material
Source: publisher figshare collection journal article supplement (https://acs.figshare.com/ndownloader/files/19328867)
Supplement: Supplementary file 1 [file 19328867]

## Supporting Information

### Estimation of Protein-Ligand Unbinding Kinetics Using Non-Equilibrium Targeted Molecular Dynamics Simulations

Steffen Wolf<sup>\*,†,‡,§,#</sup>, Marta Amaral<sup>§,||,∪,#</sup>, Maryse Lowinski<sup>⊥</sup>, Francois Vallée<sup>⊥</sup>, Djordje Musil<sup>||</sup>, Jörn Güldenhaupt<sup>†</sup>, Matthias K. Dreyer<sup>∠</sup>, Jörg Bomke<sup>∩</sup>, Matthias Frech<sup>||</sup>, Jürgen Schlitter<sup>†</sup>, Klaus Gerwert<sup>†</sup>

---

<sup>†</sup> Department of Biophysics, Ruhr-University Bochum, 44780 Bochum, Germany

<sup>‡</sup> Institute of Physics, Albert-Ludwigs-University Freiburg, 79104 Freiburg, Germany

<sup>§</sup> Instituto de Biologia Experimental e Tecnológica, 2780-157 Oeiras, Portugal

<sup>||</sup> Molecular Interactions and Biophysics, Merck KGaA, 64293 Darmstadt, Germany

<sup>∪</sup> Sanofi-Aventis Deutschland GmbH, Biologics Research / Protein Therapeutics, 65926 Frankfurt am Main, Germany

<sup>⊥</sup> Sanofi IDD-BioStructure and Biophysics, 94400 Vitry-sur-Seine, France

<sup>∠</sup> Sanofi-Aventis Deutschland GmbH, R&D Integrated Drug Discovery, 65926 Frankfurt am Main, Germany

<sup>∩</sup> Molecular Pharmacology, Merck KGaA, 64293 Darmstadt, Germany

<sup>#</sup> These authors contributed equally.

\*[steffen.wolf@physik.uni-freiburg.de](mailto:steffen.wolf@physik.uni-freiburg.de)

**Table S1.** Analytical data for compounds **1j** and **2j**.

| #         | LC-MS            | <sup>1</sup> H NMR                                                                                                                                                                                                                                                                                                                                                                     |
|-----------|------------------|----------------------------------------------------------------------------------------------------------------------------------------------------------------------------------------------------------------------------------------------------------------------------------------------------------------------------------------------------------------------------------------|
| <b>1j</b> | M+H [m/z] 287.08 | <sup>1</sup> H NMR (250 MHz, DMSO-d <sub>6</sub> ) δ 9.43 (s, 1H), 9.41 (s, 1H), 7.67 (d, J = 1.8 Hz, 1H), 7.54 – 7.48 (m, 1H), 7.45 – 7.33 (m, 3H), 6.71 (d, J = 8.3 Hz, 1H), 6.41 (d, J = 1.8 Hz, 1H), 6.23 (d, J = 2.3 Hz, 1H), 6.09 (dd, J = 8.4, 2.4 Hz, 1H).                                                                                                                     |
| <b>2j</b> | M+H [m/z] 415.90 | <sup>1</sup> H NMR (500 MHz, DMSO-d <sub>6</sub> ) δ 7.71 (dd, J = 8.9, 2.2 Hz, 1H), 7.65 – 7.60 (m, 2H), 7.50 (d, J = 8.9 Hz, 1H), 7.47 – 7.44 (m, 1H), 7.36 – 7.31 (m, 1H), 7.31 – 7.26 (m, 1H), 7.26 – 7.23 (m, 1H), 7.21 – 7.01 (m, 2H), 4.99 (s, 2H), 4.67 (s, 2H), 3.00 – 2.93 (m, 2H), 2.70 – 2.63 (m, 2H), 2.35 – 2.28 (m, 2H), 1.84 – 1.69 (m, 2H), 0.85 (t, J = 7.2 Hz, 3H). |

**Table S2.** Data collection and refinement statistics

|                                          | <b>2d</b>              |
|------------------------------------------|------------------------|
| <b>Data collection</b>                   |                        |
| <i>Space group</i>                       | I222                   |
| <i>Cell dimensions</i>                   |                        |
| <i>a, b, c (Å)</i>                       | 66.46 90.7 98.53       |
| <i>α, β, γ (°)</i>                       | 90.00, 90.00, 90.00    |
| <i>Resolution (Å)</i>                    | 66.73-1.33 (1.33-1.40) |
| <i>Nr. observations</i>                  | 245593                 |
| <i>Unique reflections</i>                | 63093 (4299)           |
| <i>Redundancy</i>                        | 4.6 (2.5)              |
| <i>Completeness (%)</i>                  | 91.8 (90.1)            |
| <i>R<sub>merge</sub> (%)<sup>d</sup></i> | 5.2 (38.7)             |
| <i>I/σ(I)</i>                            | 14.8 (1.8)             |
| <b>Refinement</b>                        |                        |
| <i>Resolution (Å)</i>                    | 18.73-1.33             |
| <i>R<sub>work</sub> (%)</i>              | 17.4                   |
| <i>R<sub>free</sub> (%)</i>              | 18.9                   |
| <i>Model composition (No. of atoms)</i>  |                        |
| <i>Protein</i>                           | 1638                   |
| <i>Ligand</i>                            | 33                     |
| <i>solvent</i>                           | 354                    |
| <b>PDB ID</b>                            | 5LRL                   |

**Table S3.** Statistics for ligand pulling via path 1 and path 2 (see Figure S3). Errors indicate the  $1\sigma$  confidence level from bootstrap analysis (see Methods).

| <b>compound</b> | <b>&lt;W&gt; along path 1 / kJ/mol</b> | <b>&lt;W&gt; along path 2 / kJ/mol</b> |
|-----------------|----------------------------------------|----------------------------------------|
| <b>1b</b>       | $577 \pm 11$                           | $974 \pm 31$                           |
| <b>2a</b>       | $550 \pm 19$                           | $659 \pm 16$                           |
| <b>2aa</b>      | $508 \pm 15$                           | $718 \pm 27$                           |

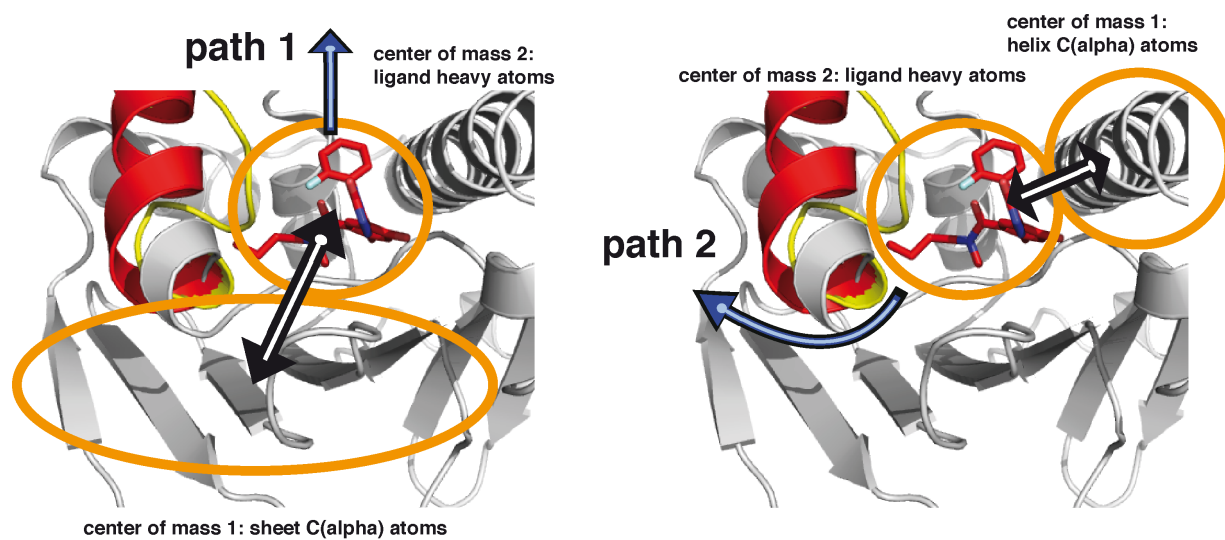

**Figure S1:** Definition of reaction coordinates in TMD runs.

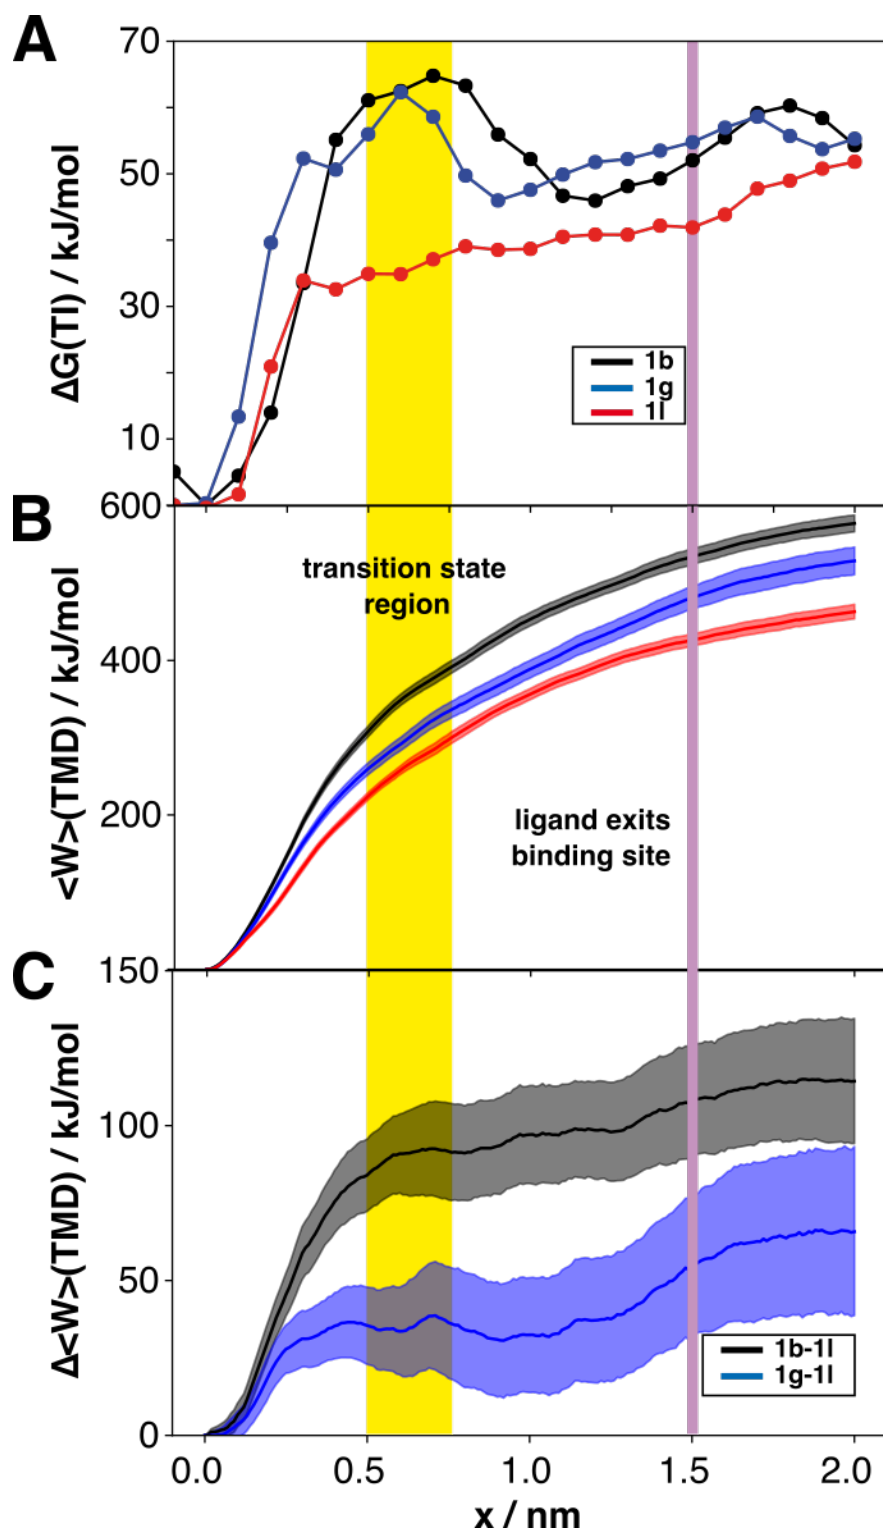

**Figure S2:** Free energy profile  $\Delta G$  (A) and non-equilibrium work  $\langle W \rangle$  (B) for compounds **1b**, **1g**, and **1l** calculated via thermodynamic integration and non-equilibrium TMD. C: differences of  $\langle W \rangle$  referenced to **1l**. The shaded surfaces represent the  $1\sigma$  level from bootstrap analysis (see Methods). The range in  $x$  which corresponds to the transition state region highlighted in yellow, distance at which the ligand exits the binding site highlighted in purple.

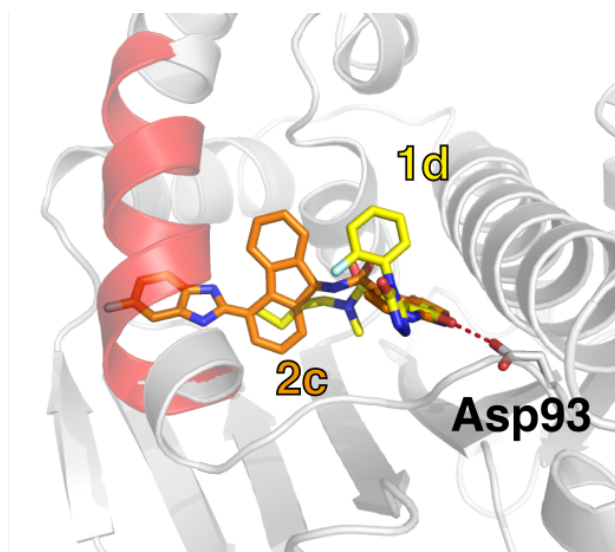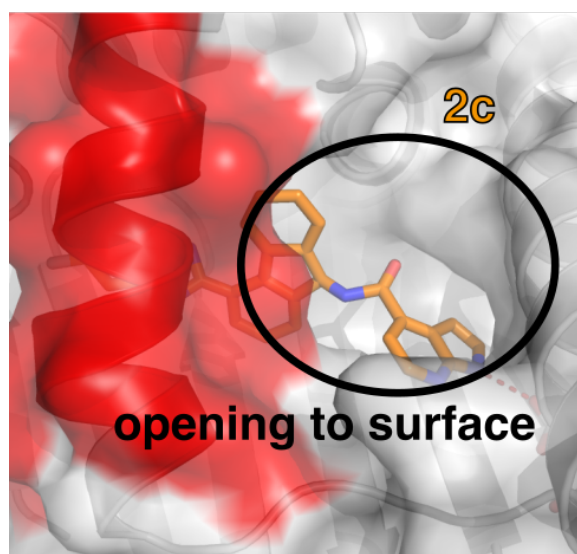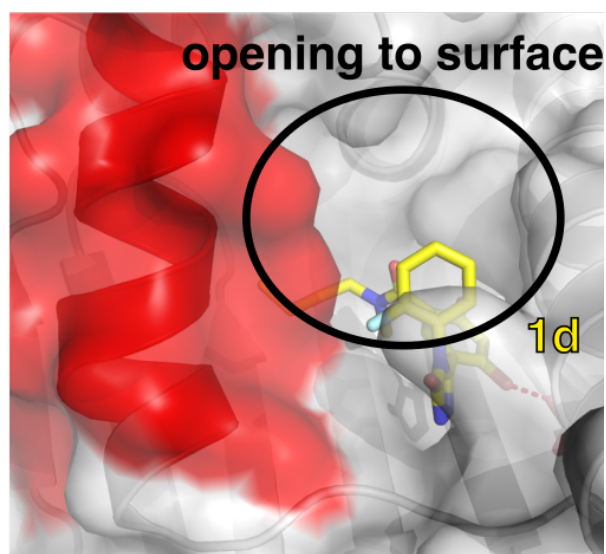

**Figure S3:** comparison of binding mode of resorcinol compound **1d** and N-heterocycle compound **2c**. Hydrogen bonds displayed as red dashes.

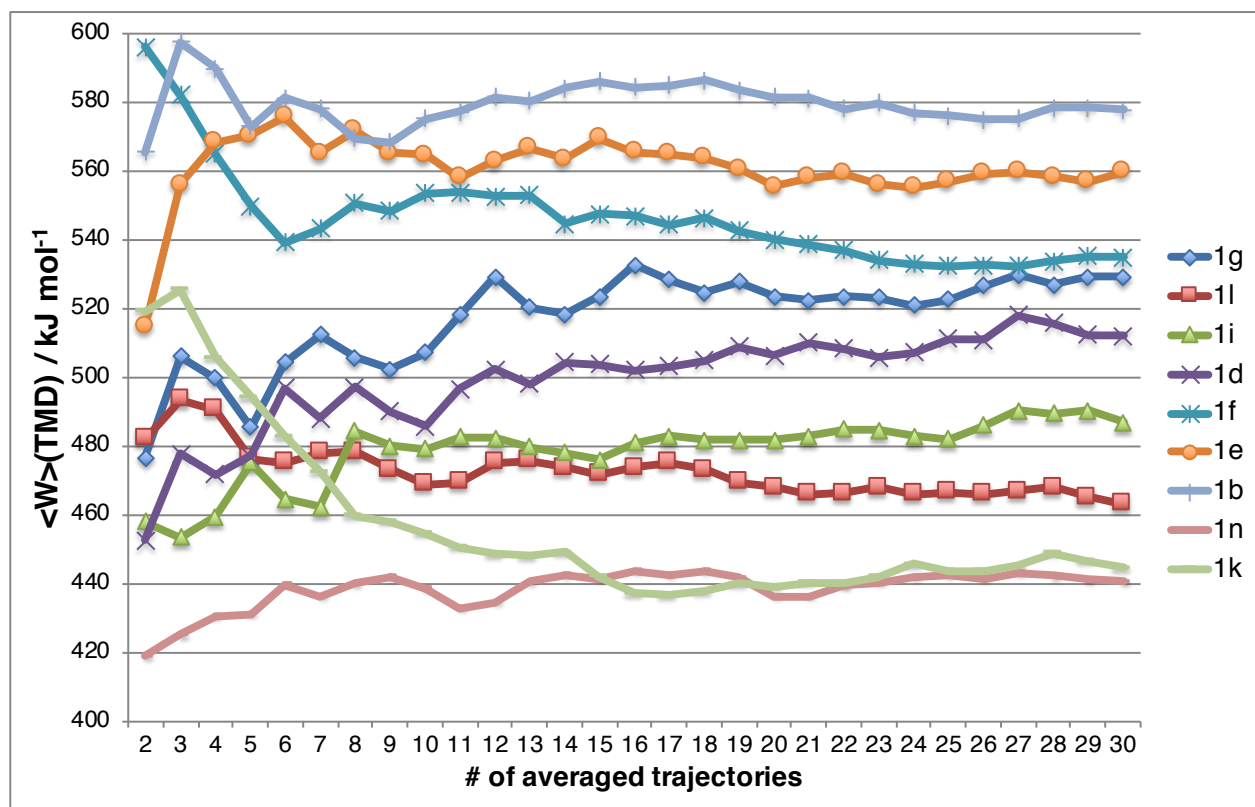

**Figure S4:** Convergence of non-equilibrium work  $\langle W \rangle$  in dependence to the number of averaged trajectories for group 1 helix binding compounds. The work appears to be converged after ca. 25 averaged trajectories.

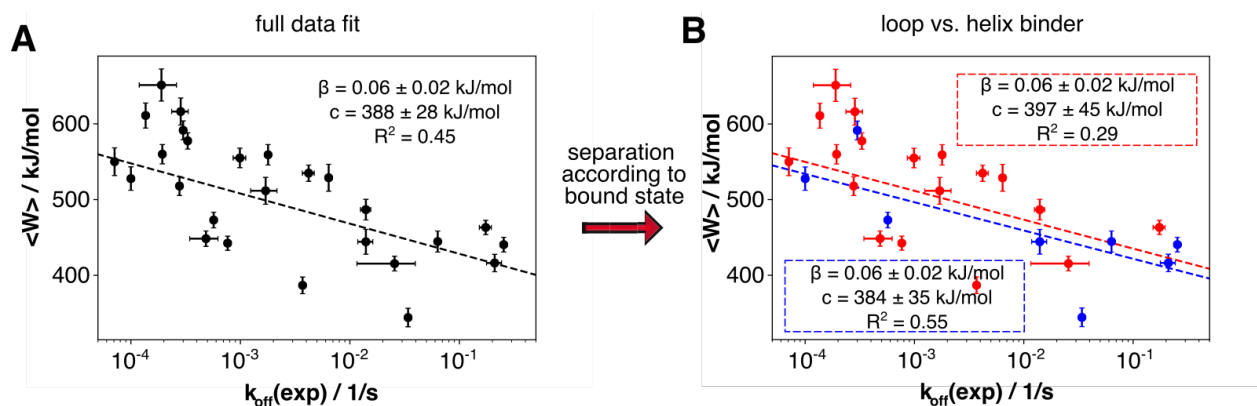

**Figure S5:** Model building for rationalization of non-equilibrium work and kinetic data. Vertical error bars indicate the  $1\sigma$  level from bootstrap analysis (see Methods), horizontal error bars indicate the standard error of the mean (SEM) for  $N=2-4$  measurements. A: fit to full data set, i.e., all compounds. B: separation into helix- (red) and loop-binding compounds (blue).



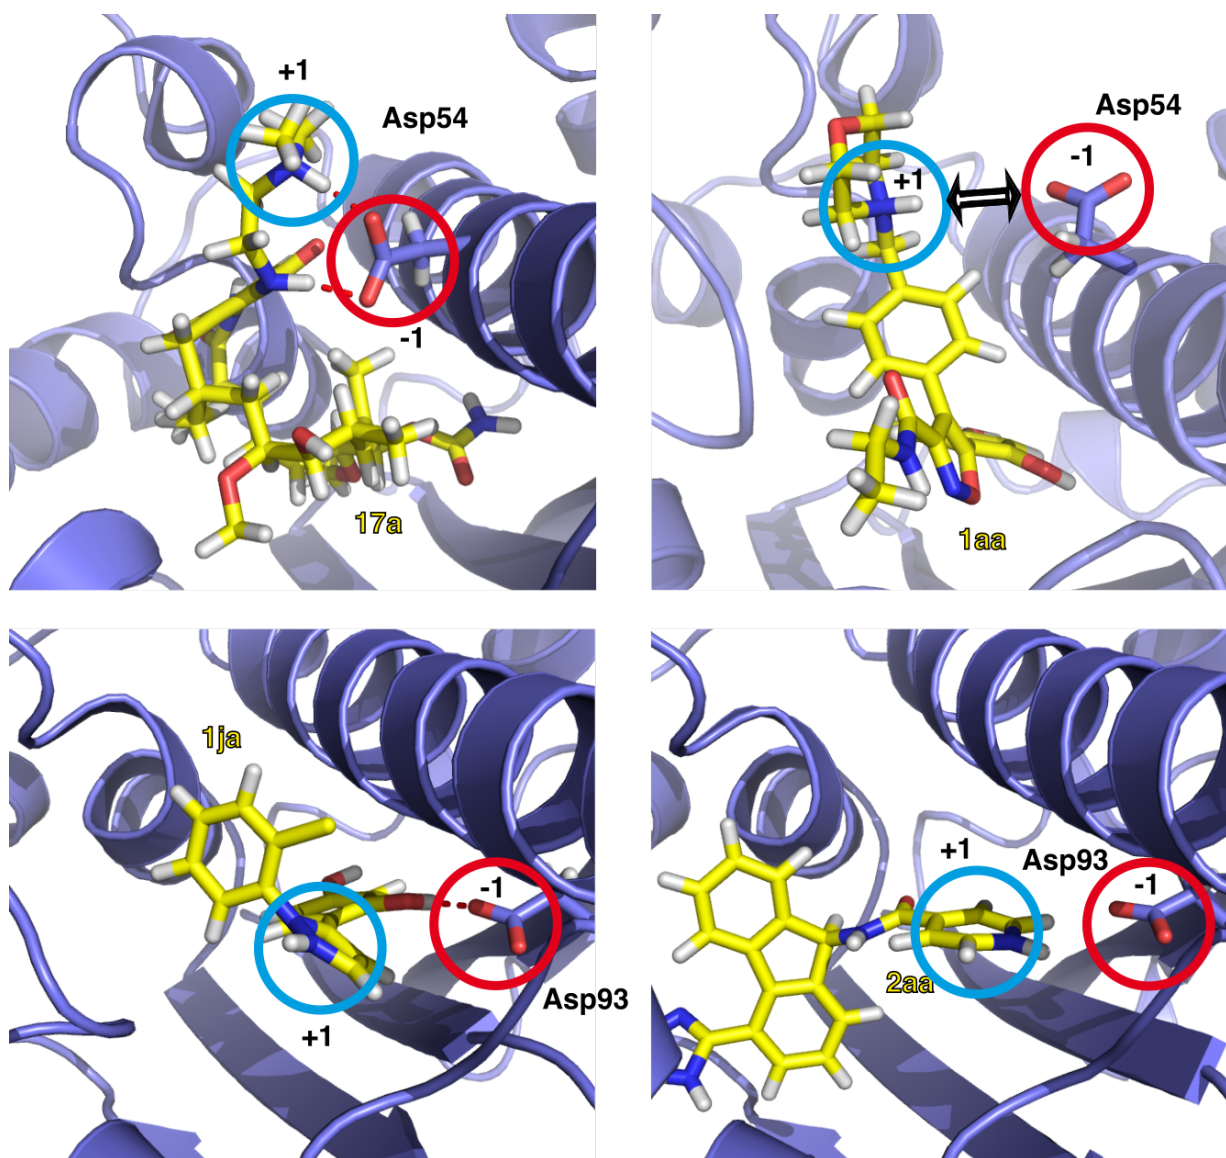

**Figure S6.** Charge interaction of compounds **17a**, **1aa**, **1ja** and **2aa** with Hsp90. Hydrogen bonds displayed as red dashes.

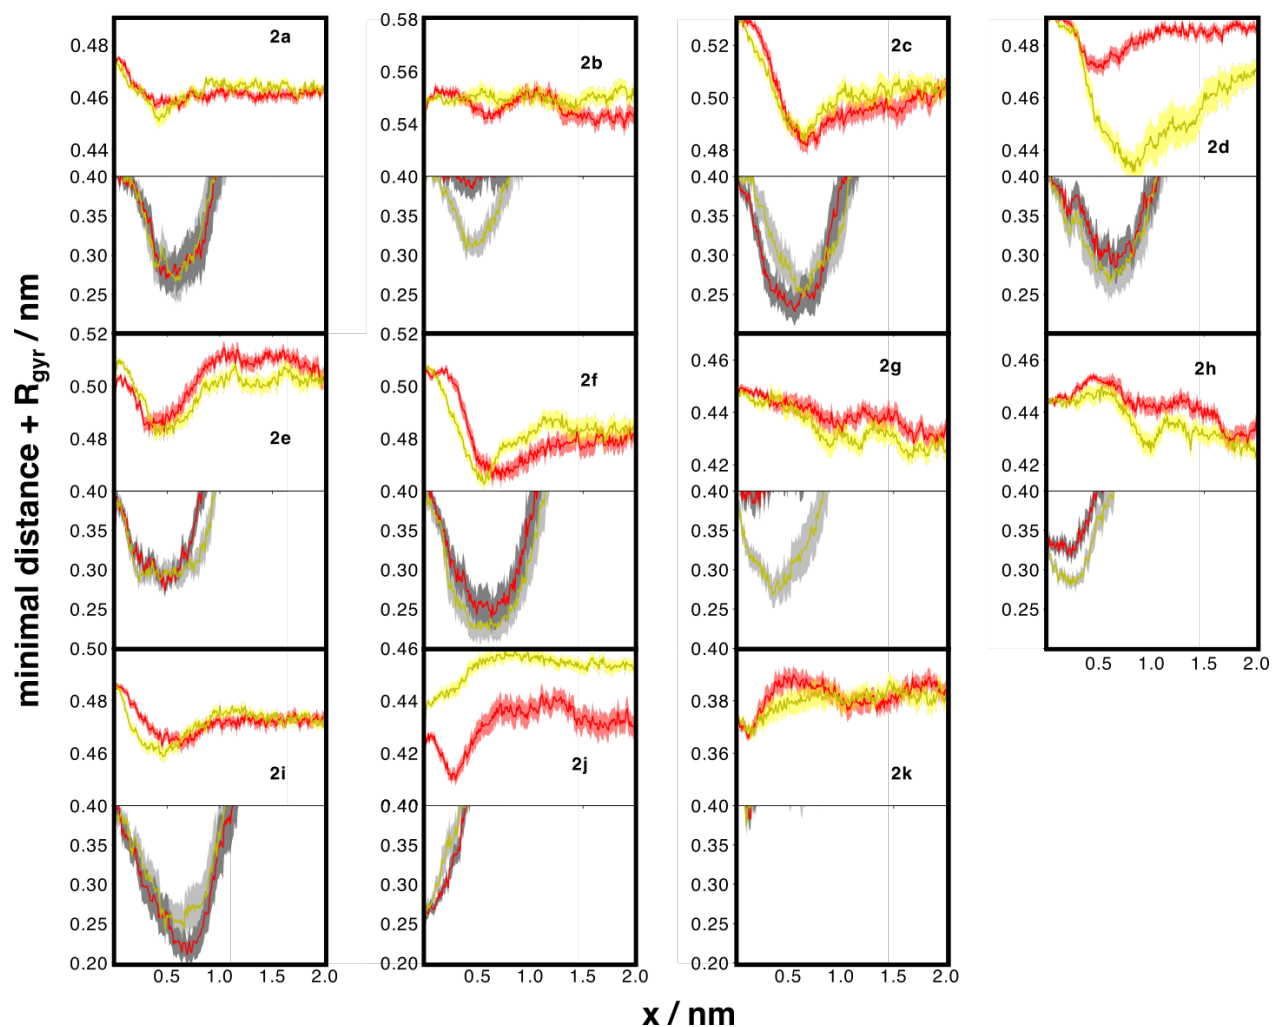

**Figure S7.** Electrostatic facilitation in group **2f** compounds. Radius of gyration and minimal distances between ligand and Asp102 as average of N=30 simulations. Trajectory means as lines,  $1\sigma$  error level from bootstrap analysis (see Methods) as shaded area. Uncharged ligand **2f** in red, protonated form **2fa** in yellow. Radii shaded in red and yellow, respectively, minimal distances in dark and light gray, respectively.
